# Supplementary material for: Chromosome-scale genome assembly of Camellia sinensis combined with multi-omics provides insights into its responses to infestation with green leafhoppers
Source: PubMed Central journal article supplement (PMC9539759; doi:10.3389/fpls.2022.1004387), 2022-09-23
Supplement: Data_Sheet_1.pdf [file Data_Sheet_1.pdf]

## *Supplementary Material*

Supplementary Table 1. Statistic of sequencing data of tea plant genome using  
ONT PromethION™

| DataType   | SeqNum     | SumBase            | N50Len | N90Len | Mean Len | MaxLen  | MeanQual |
|------------|------------|--------------------|--------|--------|----------|---------|----------|
| Clean data | 13 610 732 | 289 671 640<br>748 | 28 050 | 15 295 | 21 282   | 723 888 | 7.95     |

Supplementary Table 2. Statistic of read length distribution

| Length      | ReadsNum  | TotalLength     | Percent | AveLength |
|-------------|-----------|-----------------|---------|-----------|
| 2000-5000   | 1 169 364 | 3 956 336 035   | 1.37%   | 3 382.32  |
| 5000-10000  | 1 220 095 | 8 945 491 981   | 3.1%    | 7 331.79  |
| 10000-20000 | 2 863 699 | 45 179 861 668  | 15.66%  | 15 776.74 |
| 20000-30000 | 4 191 515 | 103 209 499 279 | 35.78%  | 24 623.43 |
| 30000-40000 | 1 709 847 | 58 457 906 753  | 20.26%  | 34 188.96 |
| 40000-50000 | 756 974   | 33 644 120 326  | 11.66%  | 44 445.54 |
| 50000-60000 | 374 423   | 20 344 589 753  | 7.05%   | 54 335.84 |
| 60000-70000 | 148 208   | 9 505 783 940   | 3.29%   | 64 138.12 |
| 70000-80000 | 47 767    | 3 533 328 709   | 1.22%   | 73 970.07 |
| >=80000     | 18 611    | 1 673 395 252   | 0.58%   | 89 914.31 |

Supplementary Table 3. Summary of contig level assembly of tea plant genome

| Contig number | Contig length(bp) | Contig N50 | Contig N90(bp) | Contig max(bp) | GC content(%) | Gap total length(bp) |
|---------------|-------------------|------------|----------------|----------------|---------------|----------------------|
| 16 593        | 3 346 579<br>149  | 778 605    | 88 481         | 7 715 254      | 38.56%        | 0                    |

Supplementary Table 4. The rate of clean reads mapped to tea plant genome

| Total reads | Mapped reads | Mapped(%) | Properly mapped reads | Properly mapped(%) |
|-------------|--------------|-----------|-----------------------|--------------------|
| 916 216 962 | 839 786 900  | 91.66%    | 783 084 078           | 85.47%             |

Supplementary Table 5. CEGMA evaluation of the genomic completeness of tea plant

|                        | number | Proportion(%) |
|------------------------|--------|---------------|
| Complete CEGMA         | 415    | 90.61         |
| Highly conserved CEGMA | 187    | 75.40         |
| Total CEGAM            | 458    | 100           |

Supplementary Table 6. BUSCO evaluation of the genomic completeness of tea plant

|  | Number | Proportion(%) |
|--|--------|---------------|
|  |        |               |

|                                   |      |       |
|-----------------------------------|------|-------|
| Complete BUSCO(C)                 | 1264 | 87.78 |
| Complete and single-copy BUSCO(S) | 1164 | 80.83 |
| Complete and duplicated BUSCO(D)  | 100  | 6.94  |
| Fragmented BUSCO(F)               | 39   | 2.71  |
| Missing BUSCO(M)                  | 137  | 9.51  |
| Total BUSCO groups                | 1440 | 100   |

Supplementary Table 7. Statistics of clean data from Hi-C mapped to genome

| Mapping type             | number        | Ratio (%) |
|--------------------------|---------------|-----------|
| Total read pairs         | 1 419 689 361 | 100       |
| Mapped reads             | 2 313 815 368 | 81.49     |
| Unique mapped read pairs | 446 076 186   | 31.42     |

Supplementary Table 8. Valid and invalid read pairs

| type                     | number      | Ratio (%) |
|--------------------------|-------------|-----------|
| Unique paired alignments | 446 076 186 | 100       |
| Valid interaction pairs  | 324 600 582 | 72.77     |
| Dangling end pairs       | 60 331 419  | 13.52     |
| Re-ligation pairs        | 5701 115    | 1.28      |
| Self-cycle pairs         | 11 628 256  | 2.61      |
| Dumped pairs             | 43 814 814  | 9.82      |

Supplementary Table 9. Hi-C cluster and order sequences of each chromosome in tea plant genome

| group          | Cluster number | Cluster length(bp) | Order number | Order length(bp) |
|----------------|----------------|--------------------|--------------|------------------|
| Chr1           | 831            | 230 776 669        | 593          | 219 540 409      |
| Chr2           | 763            | 260 782 366        | 519          | 250 651 633      |
| Chr3           | 810            | 244 100 597        | 510          | 224 927 390      |
| Chr4           | 815            | 233 667 602        | 567          | 222 906 260      |
| Chr5           | 811            | 225 229 618        | 570          | 216 144 798      |
| Chr6           | 849            | 220 888 383        | 557          | 207 665 262      |
| Chr7           | 765            | 226 035 287        | 484          | 209 183 189      |
| Chr8           | 677            | 207 306 623        | 467          | 198 804 852      |
| Chr9           | 751            | 180 052 669        | 507          | 169 544 396      |
| Chr10          | 590            | 180 202 317        | 371          | 171 047 584      |
| Chr11          | 632            | 170 151 961        | 432          | 162 188 652      |
| Chr12          | 828            | 165 731 616        | 360          | 137 989 047      |
| Chr13          | 685            | 151 995 148        | 403          | 137 927 593      |
| Chr14          | 503            | 154 351 489        | 321          | 147 318 784      |
| Chr15          | 331            | 117 955 952        | 189          | 112 171 158      |
| Total (ratio%) | 10641(67.47)   | 2969228297(96.35)  | 6850(64.37)  | 2788011007(93.9) |

Supplementary Table 10. Scaffold and contig level of Hi-C assembly in tea plant genome

| Scaffold number | Scaffold length(bp) | Scaffold N50(bp) | Scaffold N90(bp) | Scaffold max(bp) | Gap total length(bp) |
|-----------------|---------------------|------------------|------------------|------------------|----------------------|
| 8 936           | 3 082 241<br>746    | 207 720 862      | 112 189 958      | 250 703 433      | 683 500              |
| Contig number   | Contig length(bp)   | Contig N50(bp)   | Contig N90(bp)   | Contig max(bp)   | GC content(%)        |
| 15 771          | 3 081 558<br>246    | 723 697          | 89 025           | 6 456 183        | 38.54                |

Supplementary Table 11. The prediction of non-coding RNA

| RNA classification | Number | Family |
|--------------------|--------|--------|
| miRNA              | 104    | 23     |
| rRNA               | 261    | 4      |
| tRNA               | 669    | 25     |

Supplementary Table 12. Summary of repeat annotation of tea plant

| Type                | number    | length        | Rate (%) |
|---------------------|-----------|---------------|----------|
| ClassI              | 3 845 995 | 2 399 926 399 | 77.86%   |
| ClassI/DIRS         | 174 008   | 161 819 434   | 5.25     |
| ClassI/LINE         | 154 603   | 51 858 159    | 1.68     |
| ClassI/LTR          | 29 202    | 15 731 243    | 0.51     |
| ClassI/LTR/Copia    | 632 994   | 385 245 376   | 12.5     |
| ClassI/LTR/Gypsy    | 1 157 301 | 1 346 291 092 | 43.68    |
| ClassI/PLE/LARD     | 1 656 614 | 811 508 137   | 26.33    |
| ClassI/SINE         | 27 830    | 5 234 238     | 0.17     |
| ClassI/SINE/TRIM    | 81        | 30 643        | 0        |
| ClassI/TRIM         | 11 983    | 9 110 800     | 0.3      |
| ClassI/Unknown      | 1 379     | 331 277       | 0.01     |
| ClassII             | 236 390   | 118 488 325   | 3.84     |
| ClassII/Crypton     | 18        | 1 002         | 0        |
| ClassII/Helitron    | 38 870    | 12 786 129    | 0.41     |
| ClassII/MITE        | 7 366     | 2 667 763     | 0.09     |
| ClassII/Maverick    | 1 801     | 4 590 389     | 0.15     |
| ClassII/TIR         | 175 169   | 94 864 378    | 3.08     |
| ClassII/Unknown     | 13 166    | 4 419 994     | 0.14     |
| Potential host gene | 39 203    | 11 243 532    | 0.36     |
| SSR                 | 16 674    | 17 076 311    | 0.55     |
| Unknown             | 1 006 689 | 382 850 268   | 12.42    |
| Total               | 5 144 951 | 2 674 585 076 | 86.77    |

Supplementary Table 13. Functional annotation of tea plant genes

| Annotation database | Annotated number | Percentage (%) |
|---------------------|------------------|----------------|
|---------------------|------------------|----------------|

|                   |        |       |
|-------------------|--------|-------|
| GO annotation     | 17 919 | 55.59 |
| KEGG annotation   | 11 407 | 35.39 |
| KOG annotation    | 17 700 | 54.91 |
| Pfam annotation   | 25 939 | 80.48 |
| TrEMBL annotation | 30 959 | 96.05 |
| NR annotation     | 31 022 | 96.25 |
| All annotation    | 31 194 | 96.78 |

Supplementary Table 17. 50 DEPs exist in phenylpropanoid biosynthesis, alpha-Linolenic acid metabolism, and flavonoid biosynthesis

| Uniprot ACC | Uniprot ID | Protein name                                      |
|-------------|------------|---------------------------------------------------|
| A0A4S4D455  | TEA001905  | Uncharacterized protein                           |
| A0A4S4DD17  | TEA003727  | LRRNT_2 domain-containing protein                 |
| A0A4S4E4C5  | TEA010681  | Uncharacterized protein                           |
| A0A4S4EJ14  | TEA011765  | Uncharacterized protein                           |
| A0A4S4EA04  | TEA012289  | HSF_DOMAIN domain-containing protein              |
| A0A4S4DFA1  | TEA015906  | Cyclin N-terminal domain-containing protein       |
| A0A4S4CWR2  | TEA020350  | PPM-type phosphatase domain-containing protein    |
| A0A4V3WP28  | TEA027322  | Mur_ligase_M domain-containing protein            |
| A0A4S4CXN5  | TEA029800  | Aa_trans domain-containing protein                |
| A0A4S4E0L4  | TEA013436  | Peroxidase                                        |
| A0A4S4E216  | TEA008699  | Chlorophyll a-b binding protein                   |
| A0A4S4EA26  | TEA011776  | Uncharacterized protein                           |
| A0A4S4EHC7  | TEA022375  | Germin-like protein                               |
| A0A4S4D4X9  | TEA018193  | Uncharacterized protein                           |
| A0A4S4DY67  | TEA000939  | Uncharacterized protein                           |
| A0A4S4ED09  | TEA007838  | Uncharacterized protein                           |
| A0A4S4EI95  | TEA010521  | Lipoxygenase                                      |
| A0A4V3WNP8  | TEA018011  | Allene-oxide cyclase                              |
| A0A4V3WPJ7  | TEA011393  | Uncharacterized protein                           |
| A0A4S4EAC6  | TEA011691  | Peptidase_M16 domain-containing protein           |
| A0A4S4D4N7  | TEA013065  | Uncharacterized protein                           |
| A0A4S4DT35  | TEA019411  | Uncharacterized protein                           |
| A0A4S4E967  | TEA026798  | NAB domain-containing protein                     |
| A0A4S4E988  | TEA026805  | Uncharacterized protein                           |
| A0A4S4ESZ8  | TEA027441  | Uncharacterized protein                           |
| A0A4V3WJ30  | TEA027829  | PPlase cyclophilin-type domain-containing protein |
| A0A4S4F0Q3  | TEA028634  | Uncharacterized protein                           |
| A0A4S4EN55  | TEA024566  | Peroxidase                                        |
| A0A4S4D0Z1  | TEA002780  | Rhomboid domain-containing protein                |
| A0A4S4DNL6  | TEA003751  | Protein kinase domain-containing protein          |
| A0A4S4DUQ4  | TEA008473  | GH18 domain-containing protein                    |
| A0A4S4DYU8  | TEA012735  | LIM zinc-binding domain-containing protein        |

|            |           |                                           |
|------------|-----------|-------------------------------------------|
| A0A4S4DQ18 | TEA012891 | Uncharacterized protein                   |
| A0A4S4EYY8 | TEA015018 | F-box domain-containing protein           |
| A0A4S4DQS9 | TEA022042 | Uncharacterized protein                   |
| A0A4S4DUL8 | TEA022897 | Glutathione transferase                   |
| A0A4S4ESE8 | TEA028587 | PhoLip_ATPase_C domain-containing protein |
| A0A4S4DI86 | TEA028682 | DUF676 domain-containing protein          |
| A0A4S4D0R4 | TEA029796 | NAC domain-containing protein             |
| A0A4S4D0Z6 | TEA024390 | Peroxidase                                |
| A0A4S4D6Z6 | TEA013258 | Peroxidase                                |
| A0A4S4DKA0 | TEA011333 | Peroxidase                                |
| A0A4S4EBX2 | TEA009181 | PKS_ER domain-containing protein          |
| A0A4S4ECG9 | TEA024818 | 4-coumarate--CoA ligas                    |
| A0A4S4EHQ5 | TEA028919 | NAD(P)-bd_dom domain-containing protein   |
| A0A4V3WMM3 | TEA029791 | Aldedh domain-containing protein          |
| A0A4V3WQ16 | TEA000358 | Caffeoyl-CoA O-methyltransferase          |
| A0A4V3WQ95 | TEA009019 | Peroxidase                                |
| A0A4S4D9R0 | TEA017085 | Uncharacterized protein                   |
| A0A4V6RY27 | TEA013101 | S-acyltransferase                         |

Supplementary Table 20. The degree of the hub proteins in the merged DEPs PPIN

| Uniprot ACC | Uniprot ID | Protein name                                      | Degree |
|-------------|------------|---------------------------------------------------|--------|
| A0A4S4EAC6  | TEA011691  | Peptidase_M16 domain-containing protein           | 219    |
| A0A4V3WMM3  | TEA029791  | Aldedh domain-containing protein                  | 107    |
| A0A4S4EHQ5  | TEA028919  | NAD(P)-bd_dom domain-containing protein           | 104    |
| A0A4V3WJ30  | TEA027829  | PPLase cyclophilin-type domain-containing protein | 101    |
| A0A4S4D9R0  | TEA017085  | Uncharacterized protein                           | 98     |
| A0A4V3WP28  | TEA027322  | Mur_ligase_M domain-containing protein            | 97     |
| A0A4V3WQ16  | TEA000358  | Caffeoyl-CoA O-methyltransferase                  | 93     |
| A0A4S4ECG9  | TEA024818  | 4-coumarate--CoA ligas                            | 83     |
| A0A4S4DFA1  | TEA015906  | Cyclin N-terminal domain-containing protein       | 60     |
| A0A4S4E216  | TEA008699  | Chlorophyll a-b binding protein                   | 55     |
| A0A4S4EN55  | TEA024566  | Peroxidase                                        | 52     |
| A0A4S4D0Z1  | TEA002780  | Rhomboid domain-containing protein                | 41     |
| A0A4S4DY67  | TEA000939  | Uncharacterized protein                           | 39     |
| A0A4S4D4N7  | TEA013065  | Uncharacterized protein                           | 34     |
| A0A4S4ED09  | TEA007838  | Uncharacterized protein                           | 29     |
| A0A4S4D6Z6  | TEA013258  | Peroxidase                                        | 26     |
| A0A4S4D0Z6  | TEA024390  | Peroxidase                                        | 25     |
| A0A4S4EI95  | TEA010521  | Lipoxygenase                                      | 24     |
| A0A4S4DKA0  | TEA011333  | Peroxidase                                        | 18     |
| A0A4S4E0L4  | TEA013436  | Peroxidase                                        | 15     |
| A0A4V3WQ95  | TEA009019  | Peroxidase                                        | 14     |
